# Supplementary material for: A Time-Course Comparison of Skeletal Muscle Metabolomic Alterations in Walker-256 Tumour-Bearing Rats at Different Stages of Life
Source: MDPI journal article supplement (doi:10.3390/metabo11060404), 2021-06-20
Supplement: s1 [file s1]

**Supplementary Table S1.** Morphometric parameters and N<sub>2</sub> balance identified in weanling and young adult female Walker-256 tumour-bearing rats.

| Morphometric parameters and N <sub>2</sub> balance | Weanling             |                      |                      |                      | Young adult           |                      |                      |                      | F (DFn, DFd)     |                  |                    | P-value     |                  |       |
|----------------------------------------------------|----------------------|----------------------|----------------------|----------------------|-----------------------|----------------------|----------------------|----------------------|------------------|------------------|--------------------|-------------|------------------|-------|
|                                                    | Control              | Initial              | Intermediated        | Advanced             | Control               | Initial              | Intermediated        | Advanced             | Interaction      | Tumour evolution | Age                | Interaction | Tumour evolution | Age   |
|                                                    | Mean                 | Mean                 | Mean                 | Mean                 | Mean                  | Mean                 | Mean                 | Mean                 |                  |                  |                    |             |                  |       |
|                                                    | ± SD                  | ± SD                 | ± SD                 | ± SD                 |                  |                  |                    |             |                  |       |
| Initial weight (g)                                 | 51.25<br>±<br>1.25   | 56.63<br>±<br>5.67   | 60.47<br>±<br>6.19   | 59.24<br>±<br>3.98   | 256.16<br>±<br>16.10  | 252.08<br>±<br>11.91 | 241.45<br>±<br>8.28  | 279.54<br>±<br>9.95  | 11.89<br>(3, 45) | 12.80<br>(3, 45) | 6574.00<br>(1, 45) | <0.01       | <0.01            | <0.01 |
| Final weight (g)                                   | 126.25<br>±<br>2.63  | 85.35<br>±<br>9.57   | 95.64<br>±<br>10.36  | 115.11<br>±<br>20.49 | 268.65<br>±<br>14.88  | 254.50<br>±<br>8.97  | 256.87<br>±<br>6.95  | 282.37<br>±<br>26.30 | 1.60<br>(3, 49)  | 11.31<br>(3, 49) | 1239.00<br>(1, 49) | 0.20        | <0.01            | <0.01 |
| Δ Body weight (g)                                  | 75.00<br>±<br>1.41   | 27.44<br>±<br>5.27   | 32.19<br>±<br>7.65   | 43.48<br>±<br>14.22  | 12.48<br>±<br>5.25    | -9.90<br>±<br>11.14  | -12.90<br>±<br>8.78  | -19.38<br>±<br>30.86 | 2.98<br>(3, 45)  | 17.22<br>(3, 45) | 185.90<br>(1, 45)  | 0.04        | <0.01            | <0.01 |
| Tumour weight (g)                                  | --                   | 1.27<br>±<br>0.83    | 3.26<br>±<br>1.92    | 8.52<br>±<br>3.07    | --                    | 12.32<br>±<br>2.39   | 28.32<br>±<br>6.01   | 32.28<br>±<br>13.81  | 5.65<br>(2.41)   | 20.19<br>(2, 41) | 115.60<br>(1, 41)  | 0.01        | <0.01            | <0.01 |
| Tumour relative weight (g)                         | --                   | 0.02<br>±<br>0.01    | 0.06<br>±<br>0.03    | 0.14<br>±<br>0.05    | --                    | 0.05<br>±<br>0.01    | 0.12<br>±<br>0.03    | 0.12<br>±<br>0.05    | 3.78<br>(2, 39)  | 21.05<br>(2, 39) | 2.96<br>(1, 39)    | 0.03        | <0.01            | 0.09  |
| Gastrocnemius weight (g)                           | 0.74<br>±<br>0.02    | 0.45<br>±<br>0.04    | 0.47<br>±<br>0.05    | 0.44<br>±<br>0.12    | 1.93<br>±<br>0.14     | 1.56<br>±<br>0.45    | 1.22<br>±<br>0.17    | 1.22<br>±<br>0.36    | 3.50<br>(3, 49)  | 14.70<br>(3, 49) | 268.30<br>(1, 49)  | 0.02        | <0.01            | <0.01 |
| Gastrocnemius relative weight (g)                  | 1.45<br>±<br>0.02    | 0.81<br>±<br>0.11    | 0.81<br>±<br>0.15    | 0.70<br>±<br>0.19    | 0.75<br>±<br>0.05     | 0.62<br>±<br>0.18    | 0.50<br>±<br>0.05    | 0.45<br>±<br>0.15    | 6.60<br>(3, 45)  | 27.25<br>(3, 45) | 71.52<br>(1, 45)   | <0.01       | <0.01            | <0.01 |
| Food intake N <sub>2</sub> (mg)                    | 188.27<br>±<br>33.52 | 146.97<br>±<br>54.72 | 114.29<br>±<br>62.83 | 37.98<br>±<br>30.79  | 715.59<br>±<br>202.79 | 401.73<br>±<br>97.31 | 332.63<br>±<br>85.55 | 139.00<br>±<br>92.07 | 20.17<br>(3, 76) | 56.06<br>(3, 76) | 188.10<br>(1, 76)  | <0.01       | <0.01            | <0.01 |
| Urinary N <sub>2</sub> (mg)                        | 38.54<br>±<br>28.61  | 47.13<br>±<br>19.07  | 31.57<br>±<br>17.50  | 16.22<br>±<br>19.75  | 159.30<br>±<br>69.63  | 181.23<br>±<br>59.18 | 86.00<br>±<br>30.78  | 127.44<br>±<br>74.37 | 3.45<br>(3, 76)  | 7.11<br>(3, 76)  | 124.00<br>(1, 76)  | 0.02        | <0.01            | <0.01 |
| Faecal N <sub>2</sub> (mg)                         | 19.19<br>±<br>8.02   | 8.61<br>±<br>5.72    | 6.00<br>±<br>2.93    | 5.02<br>±<br>3.55    | 33.54<br>±<br>21.84   | 35.93<br>±<br>14.14  | 25.35<br>±<br>8.84   | 18.76<br>±<br>12.65  | 1.78<br>(3, 76)  | 7.65<br>(3, 76)  | 63.36<br>(1, 76)   | 0.15        | <0.01            | <0.01 |

|                             |                      |                      |                     |                     |                       |                      |                      |                     |                  |                  |                  |                 |                 |                 |
|-----------------------------|----------------------|----------------------|---------------------|---------------------|-----------------------|----------------------|----------------------|---------------------|------------------|------------------|------------------|-----------------|-----------------|-----------------|
| N <sub>2</sub> balance (mg) | 130.54<br>±<br>35.48 | 101.17<br>±<br>29.05 | 90.27<br>±<br>37.94 | 16.75<br>±<br>29.76 | 522.75<br>±<br>169.80 | 184.57<br>±<br>78.24 | 221.28<br>±<br>76.11 | -7.21<br>±<br>45.68 | 30.48<br>(3, 74) | 68.01<br>(3, 74) | 81.43<br>(1, 74) | <b>&lt;0.01</b> | <b>&lt;0.01</b> | <b>&lt;0.01</b> |
| N <sub>2</sub> balance (%)  | 100.00<br>±<br>27.18 | 77.50<br>±<br>22.25  | 69.15<br>±<br>29.07 | 12.83<br>±<br>22.79 | 100.00<br>±<br>32.48  | 35.31<br>±<br>14.97  | 42.33<br>±<br>14.56  | -1.38<br>±<br>8.74  | 3.03<br>(3, 74)  | 56.82<br>(3,74)  | 16.25<br>(1, 74) | <b>0.03</b>     | <b>&lt;0.01</b> | <b>&lt;0.01</b> |

Legend: Weanling and young adult female rats were distributed into control (WC and AC) and initial (WWi and AWi), intermediated (WWm and AWm) and advanced (WWa and AWa) Walker tumour-bearing. DF<sub>n</sub> and DF<sub>d</sub>: degrees of freedom for the numerator and denominator of the F ratio, respectively. Data were expressed as mean ± standard deviation (SD) and analysed by two-way ANOVA. Bold *P* values represented a significant difference.

**Supplementary Table S2.** Total gastrocnemius muscle metabolic profile identified in weanling and young adult female Walker-256 tumour-bearing rats.

| Metabolite   | Weanling               |                        |                        |                        | Young adult            |                        |                        |                        | F (DFn, DFd)     |                  |                  | P-value     |                  |       |
|--------------|------------------------|------------------------|------------------------|------------------------|------------------------|------------------------|------------------------|------------------------|------------------|------------------|------------------|-------------|------------------|-------|
|              | Control                | Initial                | Intermediated          | Advanced               | Control                | Initial                | Intermediated          | Advanced               | Interaction      | Tumour evolution | Age              | Interaction | Tumour evolution | Age   |
|              | Mean<br>±<br>SD        |                  |                  |                  |             |                  |       |
| 4-Pyridoxate | 4.60<br>±<br>1.40      | 3.73<br>±<br>1.72      | 5.32<br>±<br>2.82      | 7.60<br>±<br>4.18      | 5.00<br>±<br>2.52      | 9.27<br>±<br>1.66      | 6.33<br>±<br>2.94      | 18.92<br>±<br>8.87     | 5.83<br>(3, 48)  | 13.53<br>(3, 48) | 19.15<br>(1, 48) | <0.01       | <0.01            | <0.01 |
| Acetate      | 7.75<br>±<br>2.33      | 10.42<br>±<br>4.31     | 12.17<br>±<br>4.75     | 13.66<br>±<br>4.25     | 6.67<br>±<br>1.60      | 10.32<br>±<br>3.39     | 5.35<br>±<br>2.32      | 6.40<br>±<br>1.10      | 3.38<br>(3, 49)  | 1.77<br>(3, 49)  | 13.57<br>(1, 49) | 0.03        | 0.17             | <0.01 |
| ADP          | 9.20<br>±<br>7.14      | 10.97<br>±<br>3.86     | 22.25<br>±<br>7.90     | 14.82<br>±<br>7.20     | 8.87<br>±<br>5.07      | 8.03<br>±<br>1.13      | 7.51<br>±<br>2.67      | 8.32<br>±<br>4.24      | 3.37<br>(3, 48)  | 2.48<br>(3, 48)  | 13.08<br>(1, 48) | 0.03        | 0.07             | <0.01 |
| Alanine      | 282.40<br>±<br>90.89   | 278.28<br>±<br>61.40   | 256.73<br>±<br>90.73   | 281.50<br>±<br>127.26  | 129.36<br>±<br>24.02   | 148.33<br>±<br>17.55   | 139.94<br>±<br>31.63   | 193.21<br>±<br>41.29   | 0.33<br>(3, 49)  | 0.58<br>(3, 49)  | 27.32<br>(1, 49) | 0.80        | 0.63             | <0.01 |
| AMP          | 349.56<br>±<br>105.97  | 302.10<br>±<br>74.54   | 317.03<br>±<br>127.16  | 315.61<br>±<br>130.52  | 254.13<br>±<br>76.33   | 328.20<br>±<br>19.52   | 323.41<br>±<br>96.75   | 430.20<br>±<br>88.13   | 2.11<br>(3, 49)  | 1.22<br>(3, 49)  | 0.20<br>(1, 49)  | 0.11        | 0.31             | 0.66  |
| Anserine     | 62.91<br>±<br>44.75    | 84.07<br>±<br>28.58    | 102.18<br>±<br>14.38   | 89.37<br>±<br>43.63    | 99.66<br>±<br>62.67    | 188.39<br>±<br>74.52   | 258.12<br>±<br>191.55  | 256.59<br>±<br>99.99   | 1.54<br>(3, 46)  | 3.62<br>(3, 46)  | 26.54<br>(1, 46) | 0.21        | 0.02             | <0.01 |
| Carnosine    | 490.07<br>±<br>160.53  | 264.40<br>±<br>78.46   | 429.98<br>±<br>92.40   | 317.31<br>±<br>98.55   | 423.20<br>±<br>113.28  | 474.55<br>±<br>42.27   | 271.23<br>±<br>158.08  | 700.95<br>±<br>166.17  | 15.80<br>(3, 48) | 5.68<br>(3, 48)  | 8.38<br>(1, 48)  | <0.01       | <0.01            | <0.01 |
| Choline      | 11.17<br>±<br>2.77     | 13.35<br>±<br>3.37     | 21.39<br>±<br>4.64     | 27.45<br>±<br>11.29    | 33.70<br>±<br>11.79    | 26.12<br>±<br>7.86     | 25.47<br>±<br>16.73    | 26.52<br>±<br>5.45     | 3.17<br>(3, 47)  | 1.14<br>(3, 47)  | 11.96<br>(1, 47) | 0.03        | 0.34             | <0.01 |
| Creatine     | 2035.82<br>±<br>660.75 | 1644.58<br>±<br>487.87 | 2264.31<br>±<br>570.31 | 2505.65<br>±<br>684.57 | 1508.52<br>±<br>367.35 | 1934.75<br>±<br>242.49 | 1830.90<br>±<br>565.41 | 2390.04<br>±<br>480.99 | 1.38<br>(3, 49)  | 4.38<br>(3, 49)  | 1.60<br>(1, 49)  | 0.26        | 0.01             | 0.21  |
| Cytidine     | 5.23<br>±<br>1.57      | 2.97<br>±<br>0.87      | 4.55<br>±<br>1.17      | 6.86<br>±<br>3.01      | 1.17<br>±<br>0.22      | 1.87<br>±<br>0.25      | 4.02<br>±<br>2.13      | 5.61<br>±<br>2.41      | 1.90<br>(3, 49)  | 10.31<br>(3, 49) | 10.39<br>(1, 49) | 0.14        | <0.01            | <0.01 |

|             |         |         |         |         |         |         |         |         |         |         |         |       |       |       |
|-------------|---------|---------|---------|---------|---------|---------|---------|---------|---------|---------|---------|-------|-------|-------|
| Formate     | 3.33    | 3.24    | 3.93    | 5.93    | 2.36    | 3.19    | 2.68    | 2.51    | 1.57    | 0.99    | 5.61    | 0.21  | 0.41  | 0.02  |
|             | ±       | ±       | ±       | ±       | ±       | ±       | ±       | ±       | (3, 49) | (3, 49) | (1, 49) |       |       |       |
|             | 1.09    | 3.34    | 2.08    | 2.23    | 0.81    | 2.05    | 1.48    | 0.87    |         |         |         |       |       |       |
| Fumarate    | 6.32    | 3.55    | 4.85    | 5.66    | 3.15    | 2.95    | 2.46    | 3.10    | 1.53    | 2.22    | 24.05   | 0.22  | 0.10  | <0.01 |
|             | ±       | ±       | ±       | ±       | ±       | ±       | ±       | ±       | (3, 49) | (3, 49) | (1, 49) |       |       |       |
|             | 1.96    | 1.01    | 1.99    | 2.12    | 0.89    | 1.11    | 0.89    | 0.63    |         |         |         |       |       |       |
| Glucuronate | 80.69   | 109.18  | 131.19  | 133.26  | 97.96   | 129.48  | 144.37  | 182.38  | 0.12    | 1.25    | 0.99    | 0.94  | 0.30  | 0.32  |
|             | ±       | ±       | ±       | ±       | ±       | ±       | ±       | ±       | (3, 48) | (3, 48) | (1, 48) |       |       |       |
|             | 17.25   | 20.21   | 91.04   | 141.76  | 64.96   | 13.64   | 39.95   | 35.53   |         |         |         |       |       |       |
| Glutamate   | 160.08  | 168.54  | 91.91   | 84.62   | 41.81   | 62.41   | 52.51   | 78.96   | 6.97    | 3.67    | 42.87   | <0.01 | 0.02  | <0.01 |
|             | ±       | ±       | ±       | ±       | ±       | ±       | ±       | ±       | (3, 49) | (3, 49) | (1, 49) |       |       |       |
|             | 49.97   | 55.07   | 40.78   | 31.19   | 14.57   | 15.03   | 28.71   | 22.49   |         |         |         |       |       |       |
| Glutamine   | 347.71  | 272.07  | 182.32  | 131.51  | 98.90   | 126.15  | 82.26   | 97.63   | 4.16    | 5.96    | 39.08   | 0.01  | <0.01 | <0.01 |
|             | ±       | ±       | ±       | ±       | ±       | ±       | ±       | ±       | (3, 48) | (3, 48) | (1, 48) |       |       |       |
|             | 71.82   | 86.09   | 107.58  | 75.39   | 37.26   | 19.58   | 17.53   | 44.92   |         |         |         |       |       |       |
| Glycine     | 306.49  | 372.54  | 318.74  | 217.11  | 90.47   | 118.03  | 80.60   | 139.28  | 1.33    | 0.63    | 28.20   | 0.27  | 0.60  | <0.01 |
|             | ±       | ±       | ±       | ±       | ±       | ±       | ±       | ±       | (3, 49) | (3, 49) | (1, 49) |       |       |       |
|             | 116.97  | 175.83  | 179.18  | 152.58  | 19.07   | 10.07   | 19.53   | 27.95   |         |         |         |       |       |       |
| Histamine   | 2.17    | 1.63    | 1.58    | 2.54    | 0.65    | 1.09    | 0.70    | 0.79    | 1.83    | 1.14    | 30.81   | 0.15  | 0.34  | <0.01 |
|             | ±       | ±       | ±       | ±       | ±       | ±       | ±       | ±       | (3, 49) | (3, 49) | (1, 49) |       |       |       |
|             | 0.67    | 0.80    | 0.81    | 1.04    | 0.41    | 0.48    | 0.21    | 0.20    |         |         |         |       |       |       |
| Histidine   | 1.88    | 1.28    | 1.02    | 1.83    | 0.37    | 0.33    | 0.28    | 0.18    | 0.71    | 0.61    | 20.65   | 0.55  | 0.61  | <0.01 |
|             | ±       | ±       | ±       | ±       | ±       | ±       | ±       | ±       | (3, 49) | (3, 49) | (1, 49) |       |       |       |
|             | 0.59    | 0.60    | 0.48    | 1.74    | 0.36    | 0.20    | 0.14    | 0.05    |         |         |         |       |       |       |
| Imidazole   | 1.06    | 1.09    | 1.42    | 1.54    | 1.53    | 1.32    | 0.85    | 1.10    | 2.64    | 0.32    | 0.27    | 0.06  | 0.81  | 0.60  |
|             | ±       | ±       | ±       | ±       | ±       | ±       | ±       | ±       | (3, 49) | (3, 49) | (1, 49) |       |       |       |
|             | 0.40    | 0.39    | 0.56    | 0.43    | 0.80    | 0.81    | 0.41    | 0.38    |         |         |         |       |       |       |
| Inosine     | 12.75   | 9.73    | 12.50   | 15.92   | 13.50   | 19.12   | 14.45   | 20.91   | 1.54    | 2.73    | 7.74    | 0.22  | 0.05  | 0.01  |
|             | ±       | ±       | ±       | ±       | ±       | ±       | ±       | ±       | (3, 49) | (3, 49) | (1, 49) |       |       |       |
|             | 4.18    | 2.88    | 4.48    | 7.77    | 4.95    | 6.27    | 3.67    | 4.13    |         |         |         |       |       |       |
| Isoleucine  | 6.11    | 6.52    | 8.58    | 11.24   | 5.12    | 7.38    | 7.86    | 11.81   | 0.34    | 10.74   | 0.01    | 0.80  | <0.01 | 0.93  |
|             | ±       | ±       | ±       | ±       | ±       | ±       | ±       | ±       | (3, 49) | (3, 49) | (1, 49) |       |       |       |
|             | 1.96    | 2.13    | 3.24    | 3.19    | 1.24    | 1.27    | 3.39    | 3.88    |         |         |         |       |       |       |
| Lactate     | 1997.95 | 1950.12 | 2664.32 | 2692.80 | 2356.89 | 3368.42 | 2619.18 | 3705.32 | 1.92    | 3.02    | 8.20    | 0.14  | 0.04  | 0.01  |
|             | ±       | ±       | ±       | ±       | ±       | ±       | ±       | ±       | (3, 49) | (3, 49) | (1, 49) |       |       |       |
|             | 687.93  | 737.34  | 1108.03 | 981.74  | 701.73  | 415.28  | 820.11  | 582.62  |         |         |         |       |       |       |

|                     |        |        |        |        |       |       |       |       |         |         |         |       |       |       |
|---------------------|--------|--------|--------|--------|-------|-------|-------|-------|---------|---------|---------|-------|-------|-------|
| Leucine             | 10.66  | 11.85  | 15.05  | 23.90  | 7.44  | 10.51 | 11.69 | 16.23 |         |         |         |       |       |       |
|                     | ±      | ±      | ±      | ±      | ±     | ±     | ±     | ±     | 1.16    | 13.82   | 8.78    | 0.34  | <0.01 | <0.01 |
|                     | 3.96   | 3.68   | 3.80   | 7.08   | 1.77  | 1.99  | 3.76  | 4.60  | (3, 49) | (3, 49) | (1, 49) |       |       |       |
| Lysine              | 144.78 | 131.18 | 151.64 | 139.42 | 52.15 | 59.46 | 61.30 | 90.69 |         |         |         |       |       |       |
|                     | ±      | ±      | ±      | ±      | ±     | ±     | ±     | ±     | 0.38    | 0.29    | 19.81   | 0.77  | 0.83  | <0.01 |
|                     | 55.63  | 67.08  | 82.74  | 75.30  | 17.70 | 4.81  | 24.56 | 30.74 | (3, 49) | (3, 49) | (1, 49) |       |       |       |
| Maltose             | 8.30   | 8.55   | 7.47   | 12.47  | 5.13  | 8.37  | 7.78  | 6.02  |         |         |         |       |       |       |
|                     | ±      | ±      | ±      | ±      | ±     | ±     | ±     | ±     | 0.35    | 0.16    | 0.84    | 0.78  | 0.92  | 0.36  |
|                     | 5.18   | 3.37   | 5.16   | 15.69  | 1.86  | 5.19  | 3.10  | 0.60  | (3, 47) | (3, 47) | (1, 47) |       |       |       |
| Methionine          | 7.07   | 8.28   | 7.40   | 9.26   | 4.50  | 7.48  | 6.82  | 8.27  |         |         |         |       |       |       |
|                     | ±      | ±      | ±      | ±      | ±     | ±     | ±     | ±     | 0.29    | 2.44    | 2.44    | 0.83  | 0.08  | 0.12  |
|                     | 2.15   | 3.43   | 2.82   | 1.91   | 2.11  | 3.59  | 3.25  | 3.39  | (3, 49) | (3, 49) | (1, 49) |       |       |       |
| myo-Inositol        | 37.35  | 45.32  | 50.78  | 43.84  | 15.68 | 15.57 | 21.95 | 20.84 |         |         |         |       |       |       |
|                     | ±      | ±      | ±      | ±      | ±     | ±     | ±     | ±     | 0.34    | 1.41    | 55.06   | 0.79  | 0.24  | <0.01 |
|                     | 14.26  | 7.86   | 14.68  | 15.64  | 4.03  | 3.57  | 9.67  | 6.90  | (3, 47) | (3, 47) | (1, 47) |       |       |       |
| N,N-Dimethylglycine | 5.06   | 4.07   | 5.83   | 6.06   | 1.60  | 1.47  | 1.05  | 0.61  |         |         |         |       |       |       |
|                     | ±      | ±      | ±      | ±      | ±     | ±     | ±     | ±     | 2.82    | 0.61    | 106.60  | 0.05  | 0.61  | <0.01 |
|                     | 1.62   | 1.12   | 1.75   | 1.46   | 1.57  | 1.25  | 1.13  | 0.31  | (3, 49) | (3, 49) | (1, 49) |       |       |       |
| NAD+                | 13.98  | 9.89   | 9.85   | 5.52   | 6.56  | 3.17  | 3.19  | 2.99  |         |         |         |       |       |       |
|                     | ±      | ±      | ±      | ±      | ±     | ±     | ±     | ±     | 0.88    | 3.50    | 21.67   | 0.45  | 0.02  | <0.01 |
|                     | 4.61   | 3.63   | 4.14   | 4.15   | 7.69  | 1.16  | 2.36  | 0.72  | (3, 48) | (3, 48) | (1, 48) |       |       |       |
| NADP+               | 14.83  | 11.38  | 10.02  | 4.48   | 0.99  | 1.03  | 1.44  | 0.62  |         |         |         |       |       |       |
|                     | ±      | ±      | ±      | ±      | ±     | ±     | ±     | ±     | 4.32    | 5.06    | 96.23   | <0.01 | <0.01 | <0.01 |
|                     | 4.71   | 4.09   | 4.07   | 2.91   | 0.48  | 0.71  | 1.50  | 0.10  | (3, 46) | (3, 46) | (1, 46) |       |       |       |
| Niacinamide         | 13.18  | 13.51  | 16.64  | 24.87  | 14.60 | 20.33 | 20.69 | 26.77 |         |         |         |       |       |       |
|                     | ±      | ±      | ±      | ±      | ±     | ±     | ±     | ±     | 0.42    | 7.39    | 3.49    | 0.74  | <0.01 | 0.07  |
|                     | 4.09   | 6.35   | 7.28   | 7.78   | 4.47  | 5.58  | 8.67  | 5.50  | (3, 49) | (3, 49) | (1, 49) |       |       |       |
| Nicotinurate        | 3.35   | 5.16   | 6.73   | 8.24   | 8.31  | 8.49  | 10.36 | 11.35 |         |         |         |       |       |       |
|                     | ±      | ±      | ±      | ±      | ±     | ±     | ±     | ±     | 0.14    | 2.87    | 13.03   | 0.93  | 0.05  | <0.01 |
|                     | 1.57   | 2.92   | 3.18   | 5.65   | 2.64  | 2.65  | 2.43  | 2.52  | (3, 49) | (3, 49) | (1, 49) |       |       |       |
| N-Methylhydantoin   | 3.25   | 2.96   | 3.99   | 4.78   | 10.04 | 11.14 | 11.56 | 14.43 |         |         |         |       |       |       |
|                     | ±      | ±      | ±      | ±      | ±     | ±     | ±     | ±     | 1.12    | 5.44    | 192.90  | 0.35  | <0.01 | <0.01 |
|                     | 1.08   | 1.81   | 1.19   | 1.42   | 2.95  | 0.93  | 3.69  | 2.67  | (3, 49) | (3, 49) | (1, 49) |       |       |       |
| O-Acetylcarnitine   | 9.23   | 15.80  | 10.39  | 17.76  | 12.38 | 11.34 | 12.13 | 12.02 |         |         |         |       |       |       |
|                     | ±      | ±      | ±      | ±      | ±     | ±     | ±     | ±     | 3.01    | 2.35    | 1.08    | 0.04  | 0.08  | 0.30  |
|                     | 3.02   | 5.21   | 3.51   | 5.24   | 3.31  | 3.89  | 6.41  | 2.32  | (3, 49) | (3, 49) | (1, 49) |       |       |       |

|                             |         |        |        |        |        |         |        |         |         |         |         |      |       |       |
|-----------------------------|---------|--------|--------|--------|--------|---------|--------|---------|---------|---------|---------|------|-------|-------|
| Phenylalanine               | 4.80    | 4.99   | 8.83   | 12.63  | 5.53   | 9.09    | 9.38   | 13.94   | 0.99    | 17.83   | 3.99    | 0.41 | <0.01 | 0.05  |
|                             | ±       | ±      | ±      | ±      | ±      | ±       | ±      | ±       | (3, 49) | (3, 49) | (1, 49) |      |       |       |
|                             | 1.44    | 1.61   | 2.50   | 3.98   | 1.51   | 1.25    | 3.63   | 4.63    |         |         |         |      |       |       |
| Pyridoxine                  | 2.66    | 0.89   | 2.16   | 1.51   | 2.33   | 3.40    | 4.16   | 6.06    | 3.85    | 2.26    | 18.90   | 0.01 | 0.09  | <0.01 |
|                             | ±       | ±      | ±      | ±      | ±      | ±       | ±      | ±       | (3, 49) | (3, 49) | (1, 49) |      |       |       |
|                             | 0.80    | 0.65   | 1.48   | 0.69   | 1.77   | 0.59    | 3.22   | 3.96    |         |         |         |      |       |       |
| sn-Glycero-3-phosphocholine | 8.85    | 8.82   | 7.95   | 10.36  | 9.29   | 14.17   | 17.61  | 15.81   | 3.01    | 2.56    | 24.16   | 0.04 | 0.07  | <0.01 |
|                             | ±       | ±      | ±      | ±      | ±      | ±       | ±      | ±       | (3, 46) | (3, 46) | (1, 46) |      |       |       |
|                             | 2.48    | 4.56   | 2.72   | 2.36   | 2.25   | 3.23    | 5.66   | 4.89    |         |         |         |      |       |       |
| Succinate                   | 60.01   | 40.94  | 32.80  | 29.57  | 11.56  | 2.96    | 3.35   | 4.30    | 1.03    | 2.78    | 51.52   | 0.39 | 0.05  | <0.01 |
|                             | ±       | ±      | ±      | ±      | ±      | ±       | ±      | ±       | (3, 49) | (3, 49) | (1, 49) |      |       |       |
|                             | 24.16   | 24.22  | 14.69  | 21.75  | 11.53  | 0.99    | 1.79   | 1.34    |         |         |         |      |       |       |
| Taurine                     | 1005.47 | 667.40 | 978.88 | 894.52 | 760.44 | 1036.75 | 901.59 | 1068.94 | 3.87    | 0.79    | 0.68    | 0.01 | 0.50  | 0.41  |
|                             | ±       | ±      | ±      | ±      | ±      | ±       | ±      | ±       | (3, 49) | (3, 49) | (1, 49) |      |       |       |
|                             | 174.86  | 176.18 | 252.78 | 291.76 | 225.21 | 202.74  | 162.11 | 271.30  |         |         |         |      |       |       |
| Theophylline                | 1.51    | 2.62   | 1.56   | 1.95   | 0.88   | 1.80    | 0.87   | 2.41    | 0.66    | 2.23    | 1.19    | 0.58 | 0.10  | 0.28  |
|                             | ±       | ±      | ±      | ±      | ±      | ±       | ±      | ±       | (3, 49) | (3, 49) | (1, 49) |      |       |       |
|                             | 1.02    | 2.43   | 1.01   | 1.23   | 0.30   | 1.16    | 0.35   | 1.27    |         |         |         |      |       |       |
| Tryptophan                  | 2.03    | 2.16   | 3.05   | 3.38   | 1.27   | 1.58    | 1.40   | 2.30    | 0.97    | 4.84    | 17.99   | 0.42 | 0.01  | <0.01 |
|                             | ±       | ±      | ±      | ±      | ±      | ±       | ±      | ±       | (3, 49) | (3, 49) | (1, 49) |      |       |       |
|                             | 0.63    | 0.59   | 1.04   | 1.19   | 0.30   | 0.39    | 0.26   | 1.02    |         |         |         |      |       |       |
| Tyrosine                    | 9.39    | 8.60   | 11.99  | 15.98  | 5.95   | 9.81    | 10.24  | 14.46   | 0.55    | 6.98    | 1.19    | 0.65 | <0.01 | 0.28  |
|                             | ±       | ±      | ±      | ±      | ±      | ±       | ±      | ±       | (3, 49) | (3, 49) | (1, 49) |      |       |       |
|                             | 2.82    | 2.38   | 3.45   | 6.66   | 1.31   | 1.24    | 5.88   | 5.28    |         |         |         |      |       |       |
| UDP-glucuronate             | 12.25   | 7.46   | 10.74  | 13.12  | 4.33   | 7.49    | 8.25   | 13.02   | 1.64    | 3.52    | 3.62    | 0.19 | 0.02  | 0.06  |
|                             | ±       | ±      | ±      | ±      | ±      | ±       | ±      | ±       | (3, 49) | (3, 49) | (1, 49) |      |       |       |
|                             | 5.34    | 3.63   | 3.59   | 6.83   | 1.15   | 1.62    | 5.90   | 5.95    |         |         |         |      |       |       |
| UDP-N-Acetylglucosamine     | 5.13    | 4.00   | 5.85   | 3.80   | 1.45   | 1.66    | 3.80   | 2.79    | 0.44    | 1.21    | 7.91    | 0.72 | 0.32  | 0.01  |
|                             | ±       | ±      | ±      | ±      | ±      | ±       | ±      | ±       | (3, 49) | (3, 49) | (3, 49) |      |       |       |
|                             | 4.03    | 1.93   | 3.52   | 2.47   | 0.36   | 0.71    | 4.83   | 3.47    |         |         |         |      |       |       |
| Uracil                      | 2.58    | 2.26   | 2.67   | 4.64   | 0.57   | 1.14    | 1.07   | 1.38    | 1.63    | 3.26    | 27.88   | 0.19 | 0.03  | <0.01 |
|                             | ±       | ±      | ±      | ±      | ±      | ±       | ±      | ±       | (3, 49) | (3, 49) | (1, 49) |      |       |       |
|                             | 1.18    | 0.54   | 0.88   | 2.46   | 0.25   | 0.29    | 0.47   | 0.22    |         |         |         |      |       |       |
| Valine                      | 12.15   | 13.83  | 15.49  | 19.80  | 8.82   | 12.26   | 11.68  | 16.06   | 0.25    | 8.57    | 8.51    | 0.86 | <0.01 | 0.01  |
|                             | ±       | ±      | ±      | ±      | ±      | ±       | ±      | ±       | (3, 49) | (3, 49) | (1, 49) |      |       |       |
|                             | 3.80    | 2.97   | 3.08   | 5.08   | 1.91   | 3.03    | 4.45   | 3.68    |         |         |         |      |       |       |

|                   |                   |                     |                    |                     |                   |                    |                   |                   |                 |                 |                  |                 |                 |                 |
|-------------------|-------------------|---------------------|--------------------|---------------------|-------------------|--------------------|-------------------|-------------------|-----------------|-----------------|------------------|-----------------|-----------------|-----------------|
| Xanthine          | 6.22<br>±<br>2.01 | 3.26<br>±<br>1.89   | 1.79<br>±<br>1.01  | 4.56<br>±<br>2.44   | 1.12<br>±<br>0.30 | 2.27<br>±<br>1.27  | 0.91<br>±<br>0.20 | 0.79<br>±<br>0.32 | 4.97<br>(3, 49) | 4.12<br>(3, 49) | 34.42<br>(1, 49) | <b>&lt;0.01</b> | <b>0.01</b>     | <b>&lt;0.01</b> |
| π-Methylhistidine | 8.64<br>±<br>5.82 | 24.43<br>±<br>13.20 | 20.53<br>±<br>6.79 | 21.61<br>±<br>13.86 | 6.29<br>±<br>4.16 | 19.10<br>±<br>6.18 | 2.23<br>±<br>1.98 | 1.25<br>±<br>0.21 | 2.58<br>(3, 48) | 4.73<br>(3, 48) | 16.99<br>(1, 48) | 0.06            | <b>&lt;0.01</b> | <b>&lt;0.01</b> |
| τ-Methylhistidine | 2.65<br>±<br>3.14 | 1.93<br>±<br>1.02   | 2.27<br>±<br>0.66  | 1.61<br>±<br>0.71   | 1.23<br>±<br>0.59 | 1.10<br>±<br>0.83  | 1.33<br>±<br>0.82 | 1.15<br>±<br>0.80 | 0.39<br>(3, 49) | 0.67<br>(3, 49) | 8.80<br>(1, 49)  | 0.76            | 0.57            | <b>&lt;0.01</b> |

Legend: Weanling and young adult female rats were distributed into control (WC and AC) and initial (WWi and AWi), intermediated (WWm and AWm) and advanced (WWa and AWa) Walker tumour-bearing. DFn and DFd: degrees of freedom for the numerator and denominator of the F ratio, respectively. Data were expressed as mean ± standard deviation (SD) (mM/ mg tissue) and analysed by two-way ANOVA. Bold *P* values represented a significant difference.
