# Supplementary figures and images for: A Time-Course Comparison of Skeletal Muscle Metabolomic Alterations in Walker-256 Tumour-Bearing Rats at Different Stages of Life
Source: MDPI journal article supplement (doi:10.3390/metabo11060404), 2021-06-20

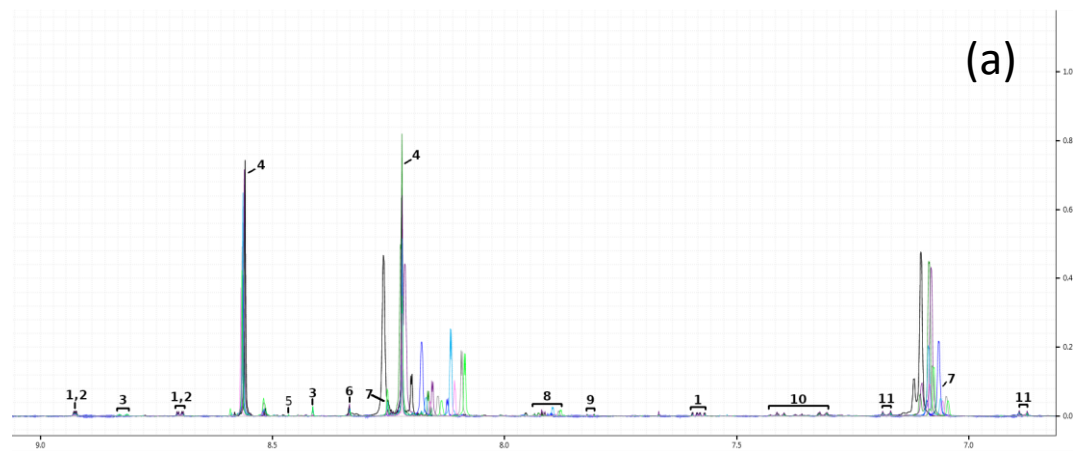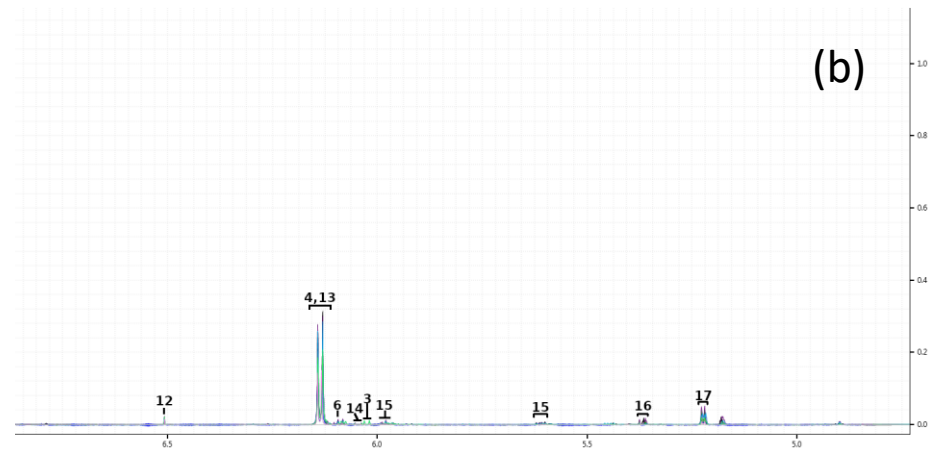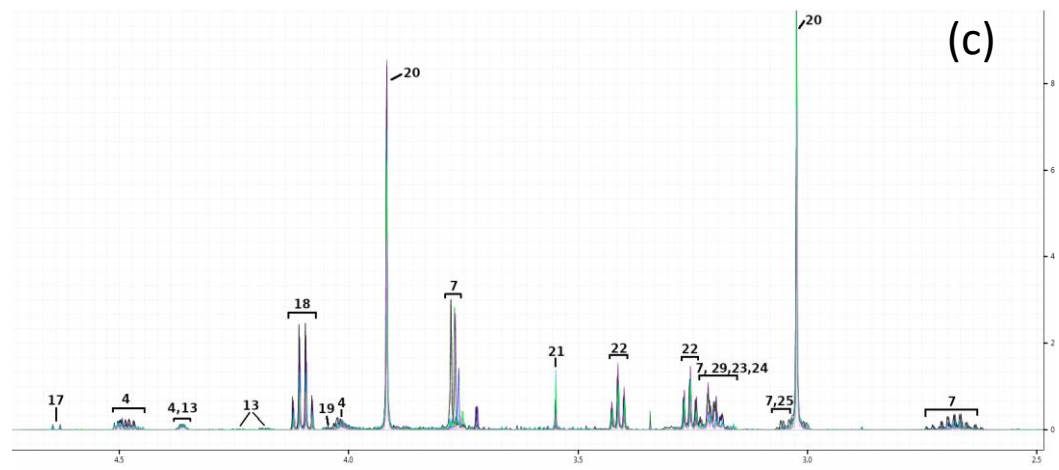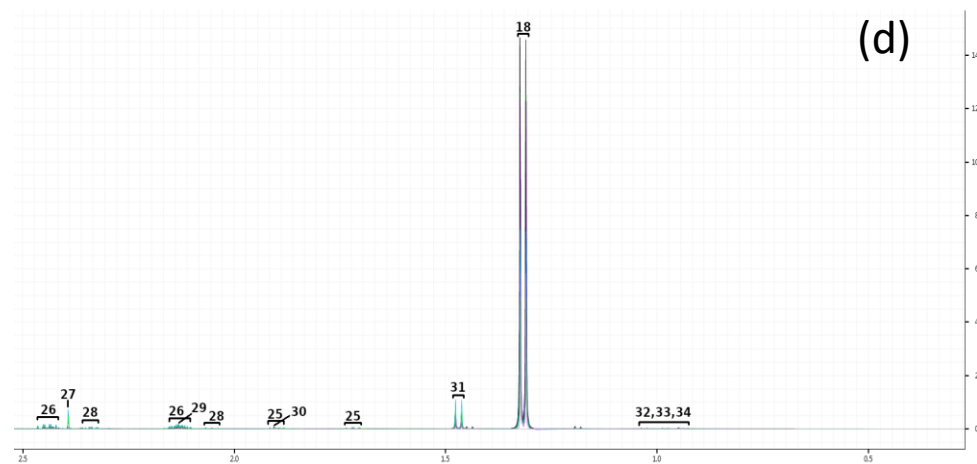

Supplement: s1 [file s1]
